# Supplementary material for: A simple synthesis of [RuCl2(NHC)(p-cymene)] complexes and their use in olefin oxidation catalysis
Source: Royal Society of Chemistry journal article supplement (doi:10.1039/d1dt00030f), 2021-01-01

## SUPPORTING INFORMATION

---

### Supporting Information

#### **A simple synthesis of [RuCl<sub>2</sub>(NHC)(*p*-cymene)] complexes and their use in olefin oxidation catalysis**

Xinyuan Ma <sup>a</sup>, Sébastien G. Guillet <sup>a</sup>, Min Peng <sup>a</sup>, Kristof Van Hecke <sup>a</sup>, and Steven P. Nolan\* <sup>a</sup>

*Department of Chemistry and Centre for Sustainable Chemistry,*

*Ghent University, Ghent, 9000, Belgium*

E-mail: [steven.nolan@ugent.be](mailto:steven.nolan@ugent.be)

## SUPPORTING INFORMATION

---

|                                                                                    |          |
|------------------------------------------------------------------------------------|----------|
| <b>Selected Optimization of the Reaction Conditions</b> .....                      | <b>3</b> |
| <i>Table S1 Optimization of the reaction conditions for 3a</i> .....               | 3        |
| <i>Table S2 Selected optimization of the reaction conditions for 3c - 3e</i> ..... | 4        |
| <b>Typical procedure for catalytic olefin oxidation</b> .....                      | <b>5</b> |
| <i>Table S3 Olefin oxidation with complexes 3-4</i> .....                          | 5        |
| <b>Molecular structures of complexes</b> .....                                     | <b>6</b> |
| <b>NMR spectra</b> .....                                                           | <b>8</b> |

## SUPPORTING INFORMATION

### Selected Optimization of the Reaction Conditions

Table S1 Optimization of the reaction conditions for **3a**

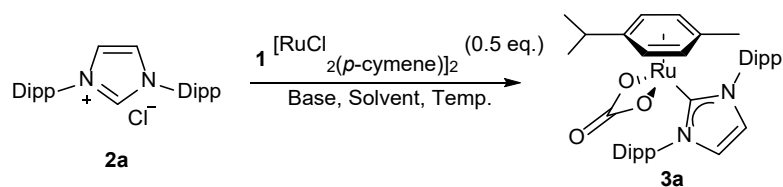

| Entry | K <sub>2</sub> CO <sub>3</sub> (eq.) | Solvent | T(°C) | Time (h) | Yield (%) <sup>b</sup> |
|-------|--------------------------------------|---------|-------|----------|------------------------|
| 1     | 3                                    | Acetone | 60    | 17       | 64                     |
| 2     | 5                                    | Acetone | 60    | 17       | 72                     |
| 3     | 7                                    | Acetone | 60    | 12       | 58                     |
| 5     | 5                                    | EtOAc   | 60    | 24       | 54                     |
| 6     | 5                                    | DCM     | 40    | 24       | 0                      |
| 7     | 5                                    | PhMe    | 60    | 22       | 62                     |
| 8     | 5                                    | PhMe    | 80    | 3        | 51                     |
| 9     | 5                                    | PhMe    | 110   | 3        | 0                      |
| 10    | 3                                    | PhMe    | 80    | 17       | 53                     |
| 11    | 4                                    | PhMe    | 80    | 3        | 54                     |

<sup>a</sup> Reaction conditions: **1** (0.12 mmol, 0.5 eq.), **2a** (0.24 mmol, 1 eq.), K<sub>2</sub>CO<sub>3</sub>, solvent (1.0 mL) in a 4 mL vial. <sup>b</sup> Isolated yields.

## SUPPORTING INFORMATION

Table S2 Selected optimization of the reaction conditions for **3c - 3e**

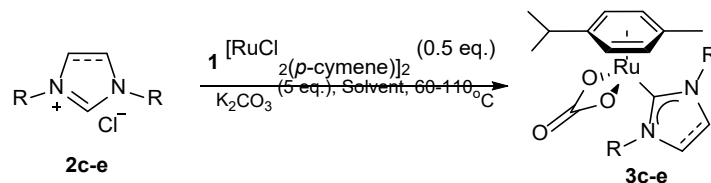

| Entry | NHC          | Solvent             | T (°C)     | Time (h)  | Yield (%) <sup>b</sup> |
|-------|--------------|---------------------|------------|-----------|------------------------|
| 1     | ICy          | Acetone             | 60         | 22        | 19                     |
| 2     | ICy          | DCM                 | 40         | 7         | 0                      |
| 3     | ICy          | PhMe                | 60         | 12        | 41                     |
| 5     | ICy          | PhMe                | 80         | 3         | 52                     |
| 6     | <i>ICy</i>   | <i>PhMe</i>         | <i>110</i> | <i>3</i>  | <i>63</i>              |
| 7     | IMe          | Acetone             | 60         | 24        | 0                      |
| 8     | IMe          | DCM                 | 40         | 20        | 0                      |
| 9     | IMe          | PhMe/Acetone        | 60         | 4         | 43                     |
| 10    | IMe          | PhMe                | 60         | 14        | 47                     |
| 11    | <i>IMe</i>   | <i>PhMe</i>         | <i>80</i>  | <i>26</i> | <i>67</i>              |
| 12    | IMe          | PhMe                | 110        | 3         | 36                     |
| 13    | SIMes        | Acetone             | 60         | 17        | 33                     |
| 14    | SIMes        | DCM                 | 40         | 22        | 0                      |
| 15    | SIMes        | PhMe                | 60         | 12        | 41                     |
| 16    | SIMes        | PhMe                | 80         | 12        | 37                     |
| 17    | <i>SIMes</i> | <i>PhMe/Acetone</i> | <i>60</i>  | <i>3</i>  | <i>38</i>              |

<sup>a</sup> Reaction conditions: **1** (0.12 mmol, 0.5 eq.), **2** (0.24 mmol, 1 eq.), K<sub>2</sub>CO<sub>3</sub> (1.18 mmol, 5 eq.), solvent (1.0 mL) in a 4 mL vial. <sup>b</sup> Isolated yields.

## SUPPORTING INFORMATION

### Typical procedure for catalytic olefin oxidation

Table S3 Olefin oxidation with complexes **3-4**.

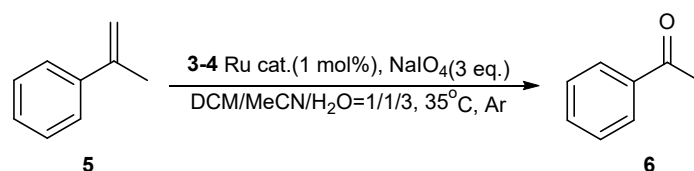

| Entry          | NHC-Ru    | Time(min) | Conv. (%) <sup>b</sup> |
|----------------|-----------|-----------|------------------------|
| 1              | <b>3a</b> | 20        | 100                    |
| 2 <sup>c</sup> | <b>3a</b> | 120       | 100 (53)               |
| 3 <sup>d</sup> | <b>3a</b> | 35        | 100                    |
| 4              | <b>3b</b> | 20        | 100 (62)               |
| 5              | <b>3c</b> | 30        | 100                    |
| 6              | <b>3d</b> | 10        | 100 (60)               |
| 7              | <b>3e</b> | 25        | 100                    |
| 8              | <b>4a</b> | 20        | 100                    |
| 9              | <b>4b</b> | 20        | 100                    |
| 10             | <b>4c</b> | 35        | 100                    |
| 11             | <b>4d</b> | 5         | 100 (65)               |
| 12             | <b>4e</b> | 30        | 100                    |
| 13             | -         | 30        | 0                      |

<sup>a</sup> Reaction conditions: **5** (0.2 mmol, 1 eq.), **3-4** (0.002 mmol, 1 mol%), NaIO<sub>4</sub> (0.6 mmol, 3 eq.), DCM/MeCN/H<sub>2</sub>O (v/v/v = 1/1/3, 1.5 mL) in a 4 mL vial. <sup>b</sup> Conversion determined by <sup>1</sup>H NMR spectroscopy (1,3,5-trimethoxybenzene as internal standard) or TLC. Between brackets are isolated yields. <sup>c</sup> 0.5 mmol of **5**, 0.05 mol% of **3a**. <sup>d</sup> Room temperature.

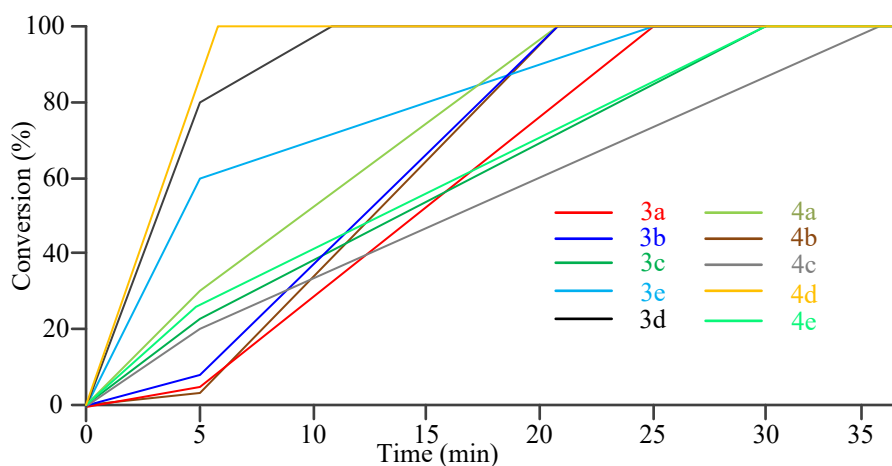

**Figure S1.** Using catalyst precursors **3-4** for olefin oxidation of  $\alpha$ -methylstyrene. **4d** has the fastest initial reaction rate in the first five minutes, and the trend of the conversion over time shows that the compound **4d** had the best catalytic performance in olefin oxidation.

## Molecular structures of complexes

Crystals that were of suitable quality for single crystal X-ray diffraction analysis were obtained in all cases by slow vapor diffusion of the antisolvent into saturated solutions of the complexes at 4 °C. CCDC2045651-2045650 (**3a** and **3d**) contain the crystallographic data for this paper and can be obtained via [http://www.ccdc.cam.ac.uk/data\\_request/cif](http://www.ccdc.cam.ac.uk/data_request/cif).

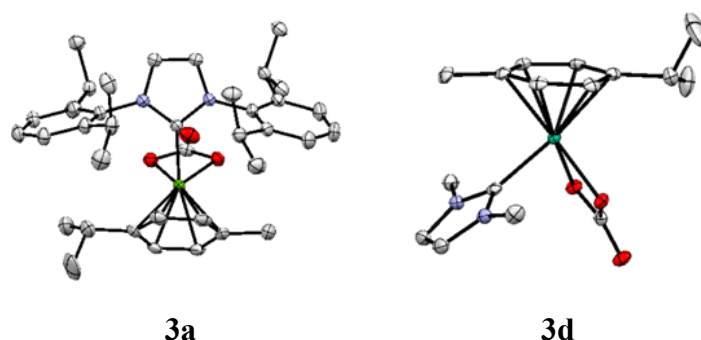

**Figure S2.** X-ray molecular structure of complexes **3a** and **3d**. Hydrogen atoms and free molecule (including the water molecules in **3d**) omitted for clarity.

## SUPPORTING INFORMATION

Table S4. Crystallographic data for complexes **3a** and **3e**

|                                             | Complex <b>3a</b> ·2CHCl <sub>2</sub>                                            | Complex <b>3e</b> ·2H <sub>2</sub> O                             |
|---------------------------------------------|----------------------------------------------------------------------------------|------------------------------------------------------------------|
| Empirical formula                           | C <sub>40</sub> H <sub>54</sub> Cl <sub>4</sub> N <sub>2</sub> O <sub>3</sub> Ru | C <sub>16</sub> H <sub>26</sub> N <sub>2</sub> O <sub>5</sub> Ru |
| Formula weight                              | 853.72                                                                           | 427.46                                                           |
| Temperature/K                               | 100(2)                                                                           | 100.28(16)                                                       |
| Crystal system                              | monoclinic                                                                       | monoclinic                                                       |
| Space group                                 | P2 <sub>1</sub> /c                                                               | P2 <sub>1</sub> /c                                               |
| a/Å                                         | 14.8188(2)                                                                       | 11.4295(2)                                                       |
| b/Å                                         | 12.79860(10)                                                                     | 10.48900(10)                                                     |
| c/Å                                         | 22.2382(3)                                                                       | 15.6396(2)                                                       |
| α/°                                         | 90                                                                               | 90                                                               |
| β/°                                         | 102.6790(10)                                                                     | 104.0610(10)                                                     |
| γ/°                                         | 90                                                                               | 90                                                               |
| Volume/Å <sup>3</sup>                       | 4114.85(9)                                                                       | 1818.76(4)                                                       |
| Z                                           | 4                                                                                | 4                                                                |
| ρ <sub>calc</sub> /cm <sup>3</sup>          | 1.378                                                                            | 1.561                                                            |
| μ/mm <sup>-1</sup>                          | 5.769                                                                            | 7.218                                                            |
| F(000)                                      | 1776.0                                                                           | 880.0                                                            |
| Crystal size/mm <sup>3</sup>                | 0.119 × 0.085 × 0.045                                                            | 0.172 × 0.068 × 0.034                                            |
| Radiation                                   | CuKα (λ = 1.54184)                                                               | Cu Kα (λ = 1.54184)                                              |
| 2θ range for data collection/°              | 6.114 to 147.78                                                                  | 7.974 to 147.384                                                 |
| Index ranges                                | -18 ≤ h ≤ 18, -13 ≤ k ≤ 15, -27 ≤ l ≤ 23                                         | -13 ≤ h ≤ 12, -12 ≤ k ≤ 12, -19 ≤ l ≤ 19                         |
| Reflections collected                       | 31252                                                                            | 17699                                                            |
| Independent reflections                     | 8213 [R <sub>int</sub> = 0.0460, R <sub>sigma</sub> = 0.0381]                    | 3629 [R <sub>int</sub> = 0.0425, R <sub>sigma</sub> = 0.0296]    |
| Data/restraints/parameters                  | 8213/0/462                                                                       | 3629/4/234                                                       |
| Goodness-of-fit on F <sup>2</sup>           | 1.022                                                                            | 1.028                                                            |
| Final R indexes [I ≥ 2σ (I)]                | R <sub>1</sub> = 0.0338, wR <sub>2</sub> = 0.0810                                | R <sub>1</sub> = 0.0248, wR <sub>2</sub> = 0.0576                |
| Final R indexes [all data]                  | R <sub>1</sub> = 0.0417, wR <sub>2</sub> = 0.0861                                | R <sub>1</sub> = 0.0309, wR <sub>2</sub> = 0.0605                |
| Largest diff. peak/hole / e Å <sup>-3</sup> | 1.15/-1.37                                                                       | 0.52/-0.56                                                       |

# SUPPORTING INFORMATION

## NMR spectra

$^1\text{H}$  and  $^{13}\text{C}\{^1\text{H}\}$  apt NMR of  $[\text{Ru}(\text{CO}_3)(\text{IPr})(p\text{-cymene})]$  (**3a**)

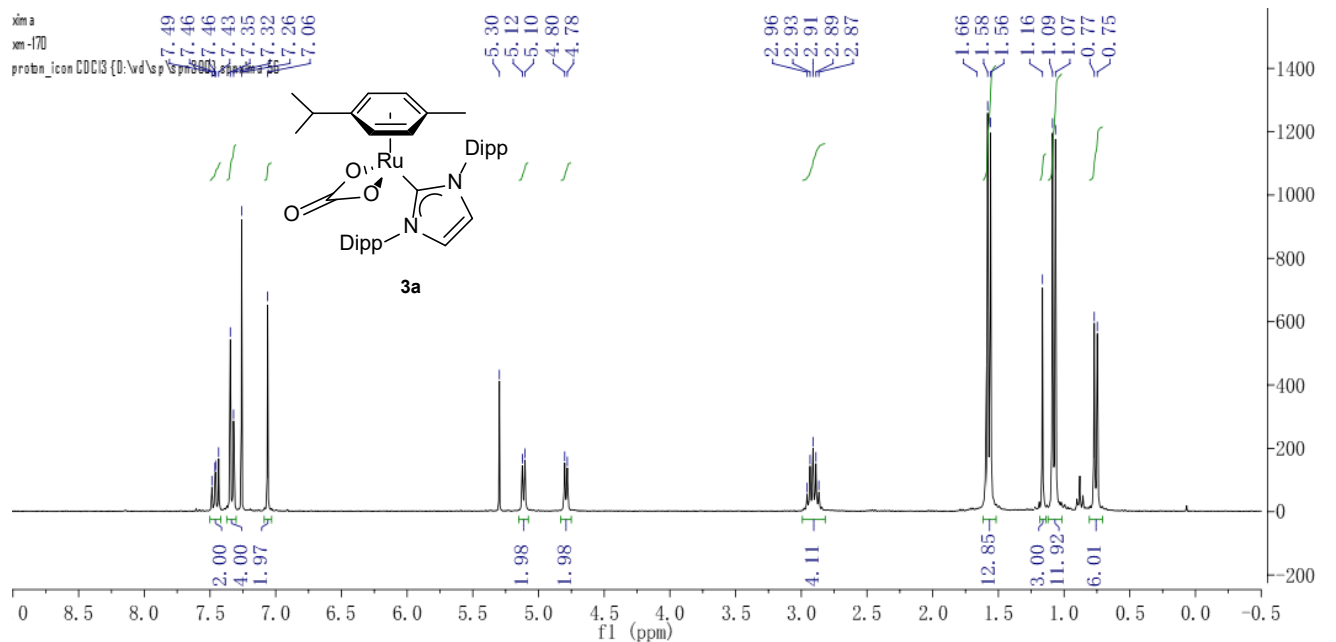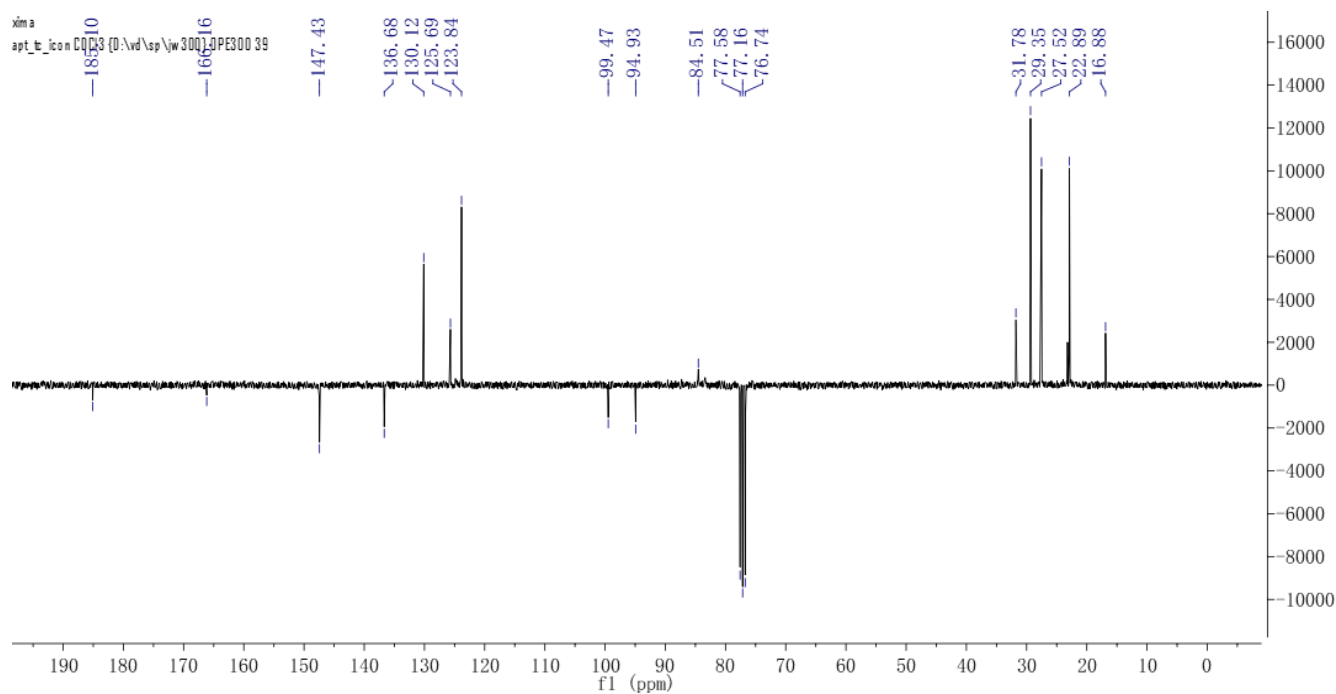



# SUPPORTING INFORMATION

## $^1\text{H}$ and $^{13}\text{C}\{^1\text{H}\}$ apt NMR of $[\text{Ru}(\text{CO}_3)(\text{IMes})(p\text{-cymene})]$ (**3b**)

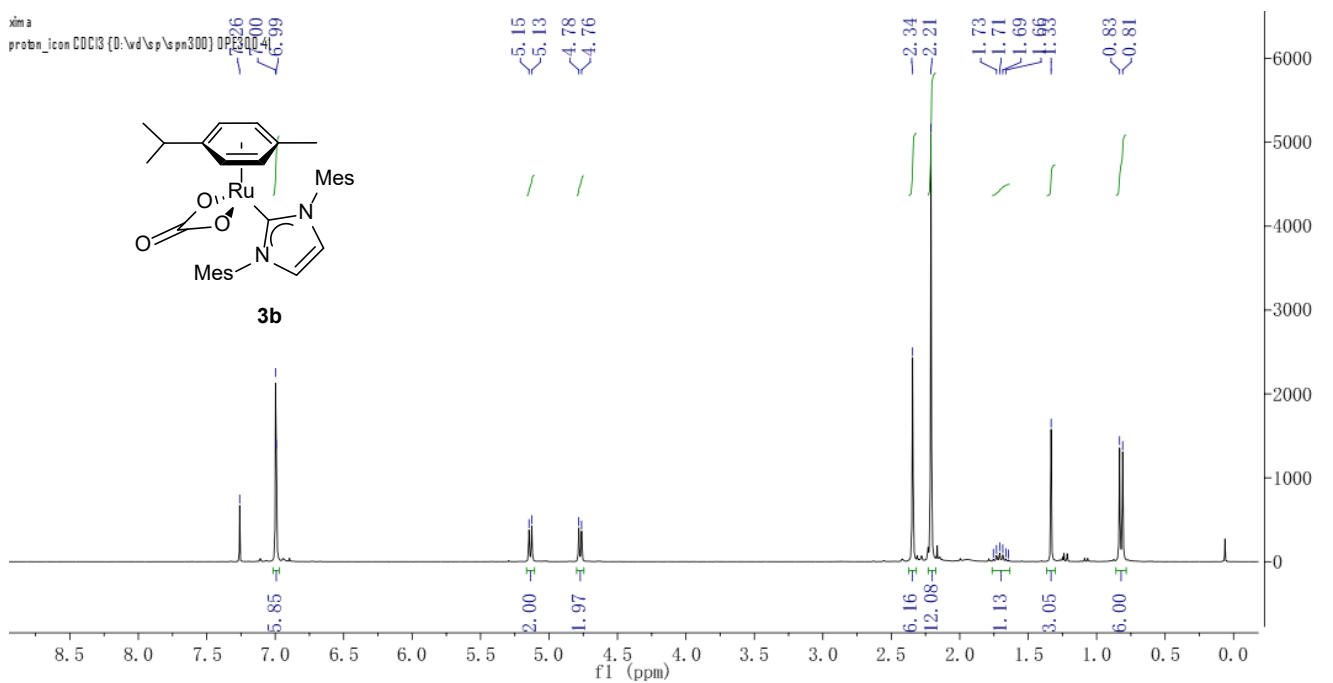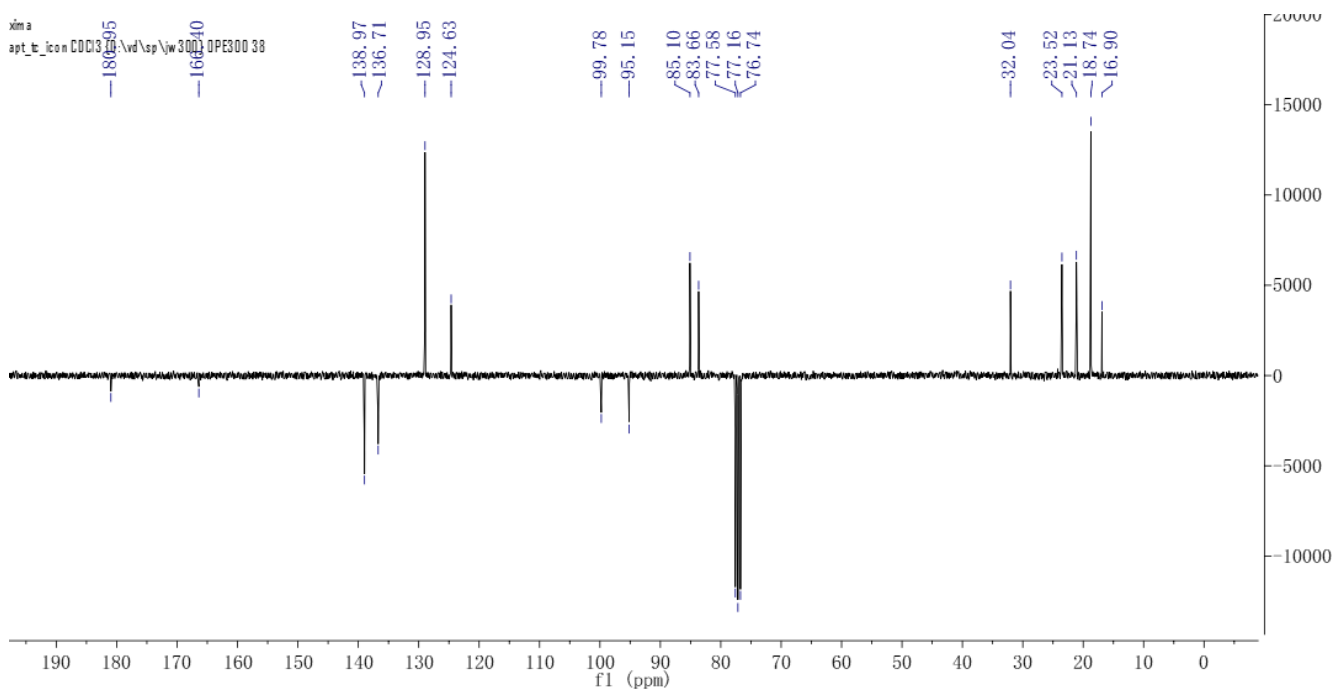

# SUPPORTING INFORMATION

## $^1\text{H}$ and $^{13}\text{C}\{^1\text{H}\}$ apt NMR of $[\text{Ru}(\text{CO}_3)(\text{ICy})(p\text{-cymene})]$ (**3c**)

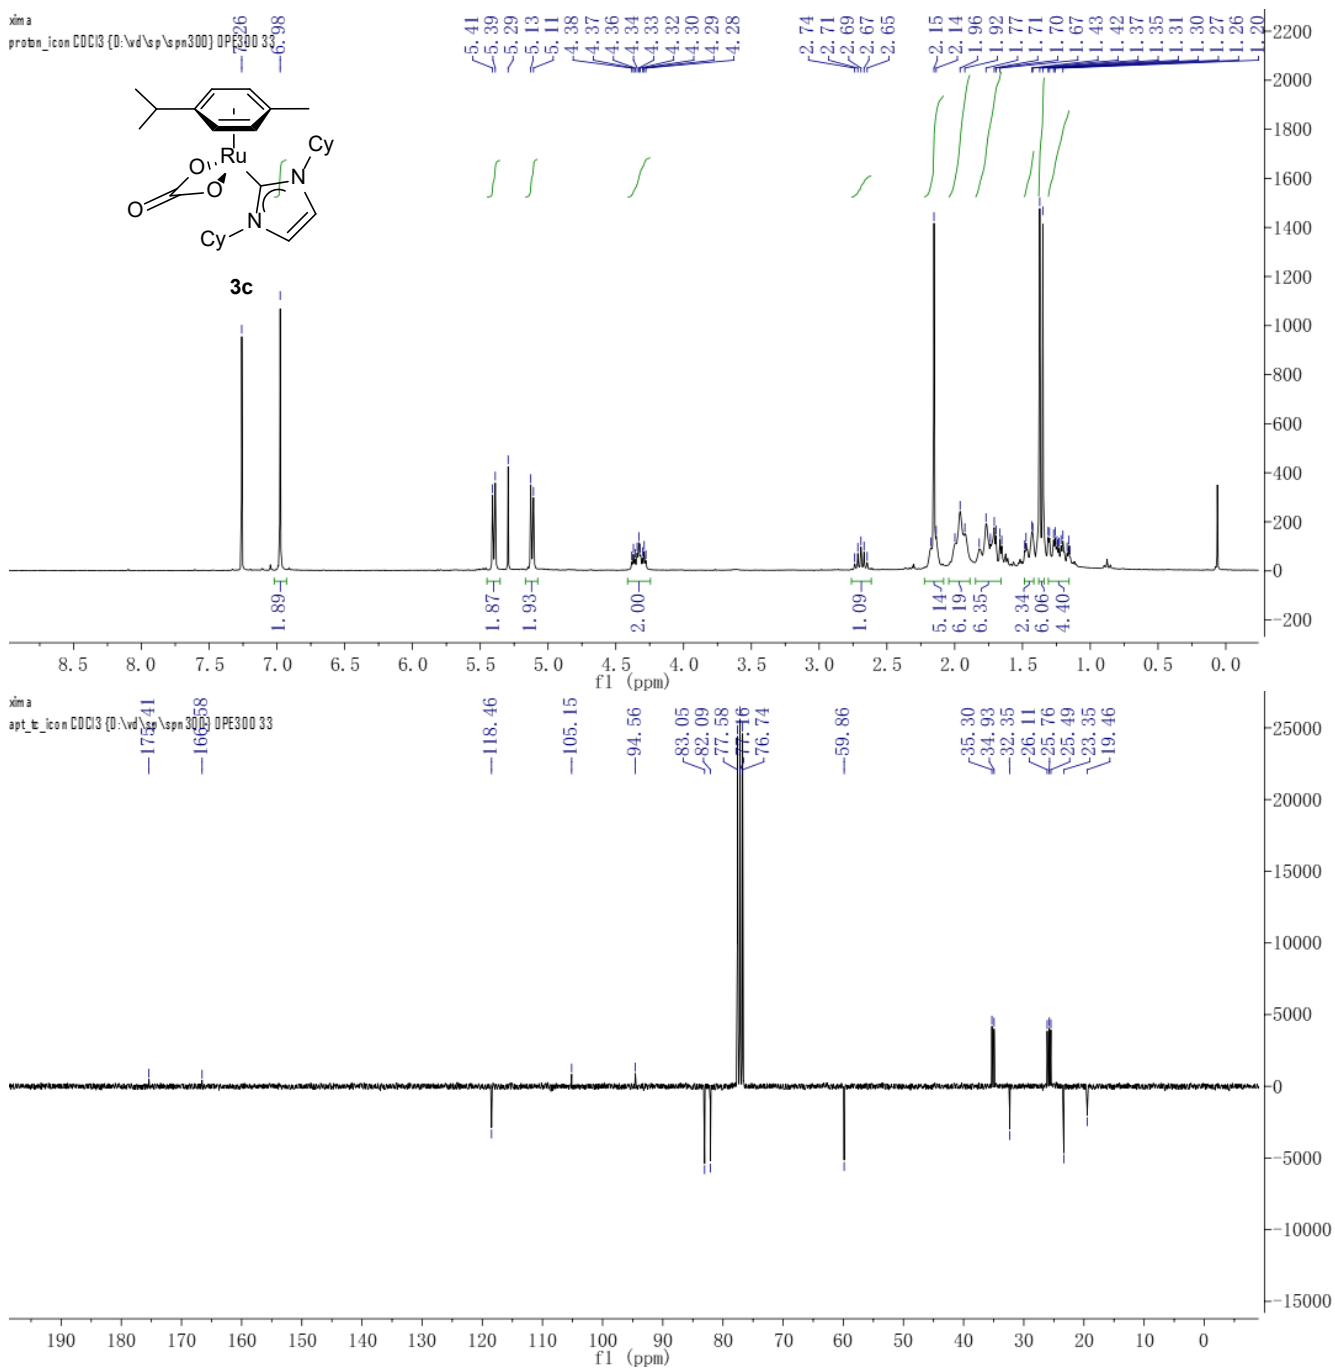

# SUPPORTING INFORMATION

## $^1\text{H}$ and $^{13}\text{C}\{^1\text{H}\}$ apt NMR of $[\text{Ru}(\text{CO}_3)(\text{IME})(p\text{-cymene})]$ (**3d**)

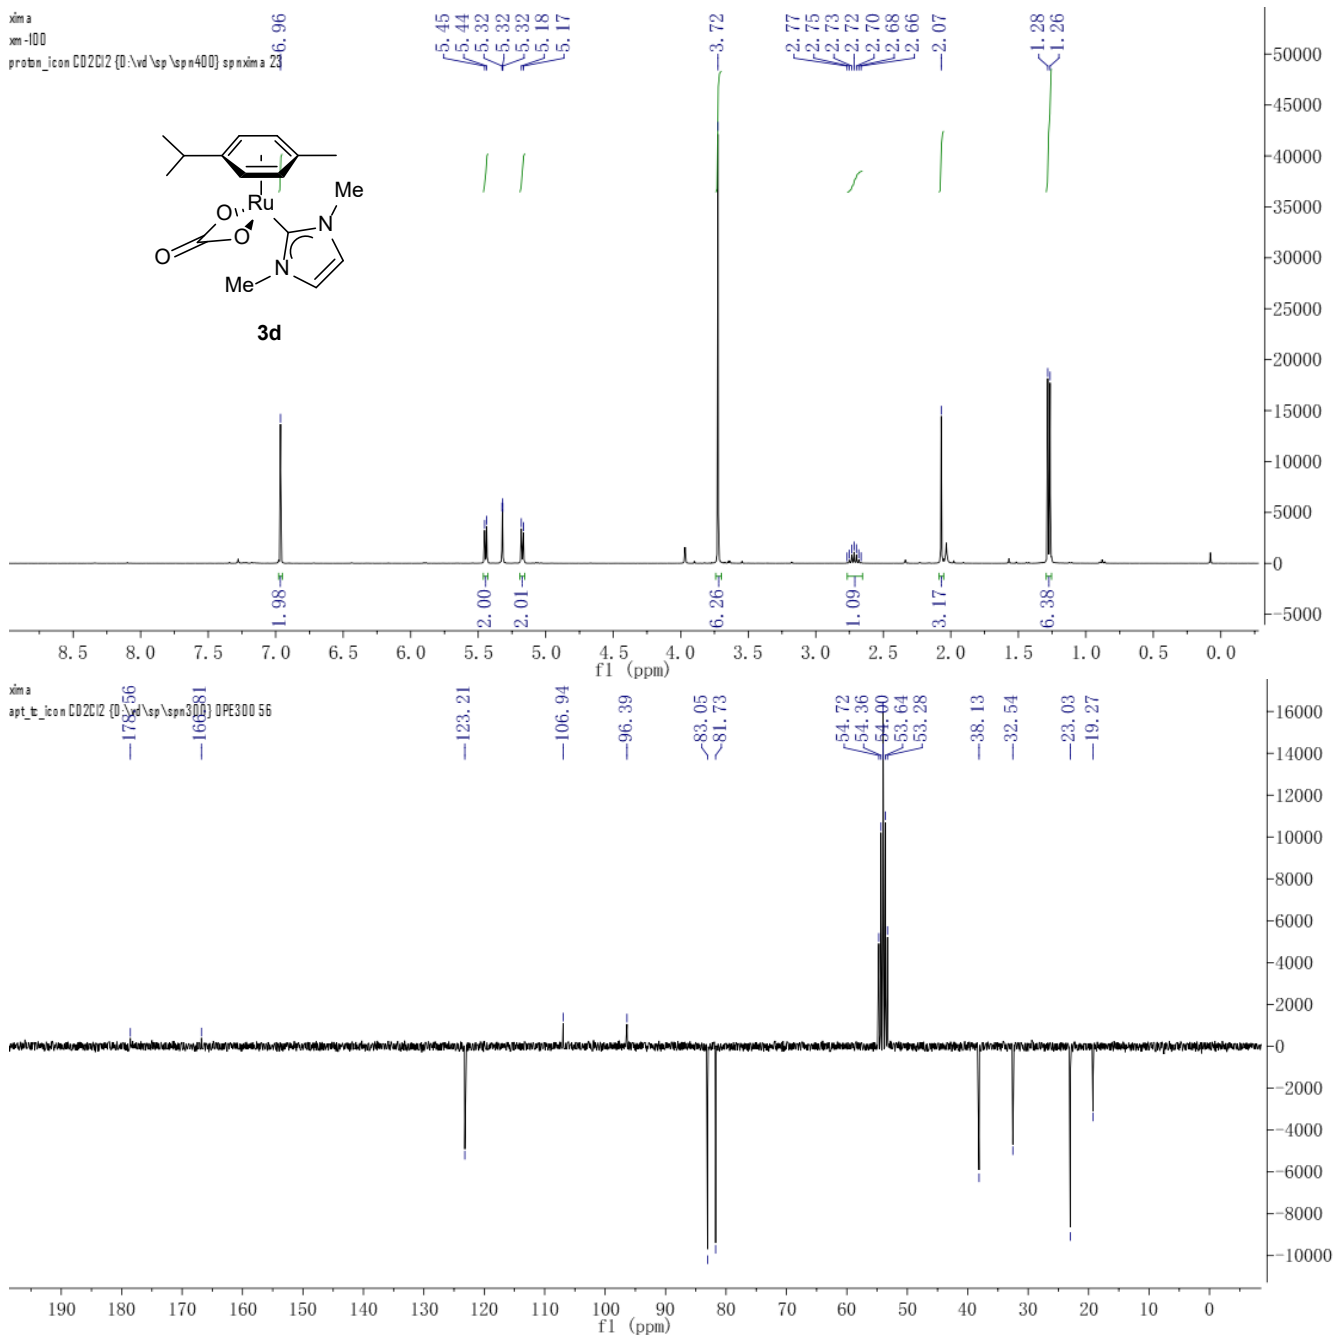

# SUPPORTING INFORMATION

## $^1\text{H}$ and $^{13}\text{C}\{^1\text{H}\}$ apt NMR of $[\text{Ru}(\text{CO}_3)(\text{SImes})(p\text{-cymene})]$ (**3e**)

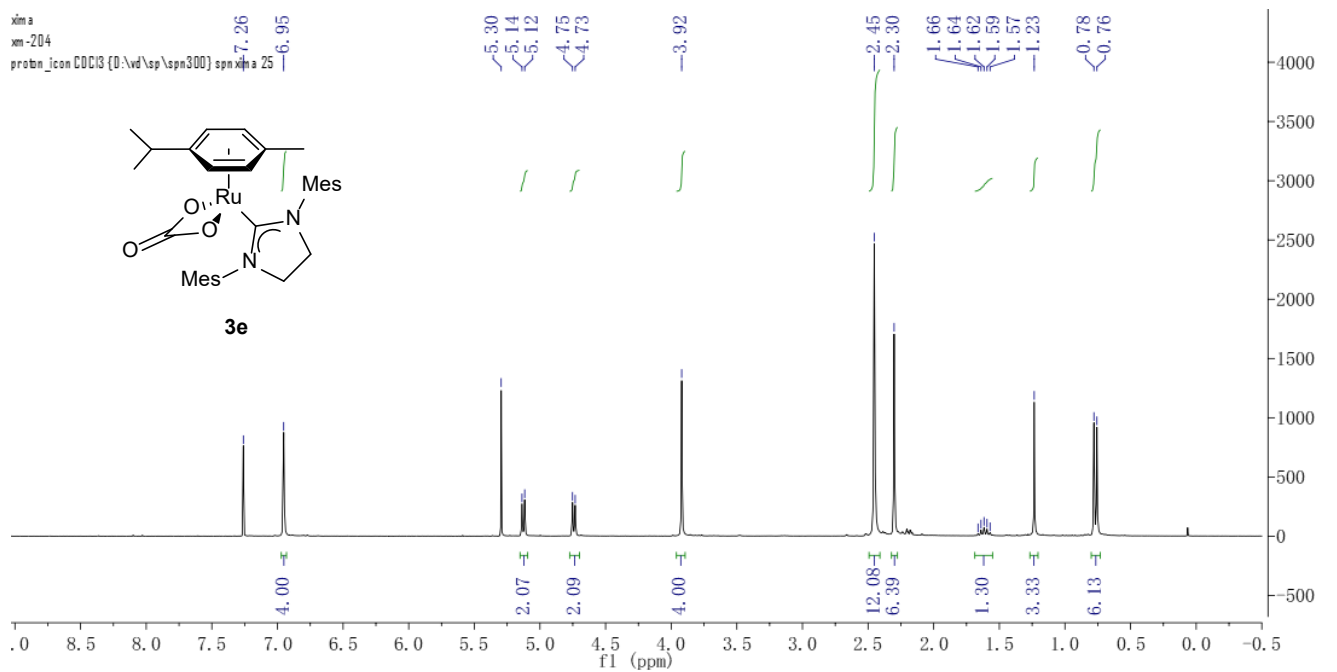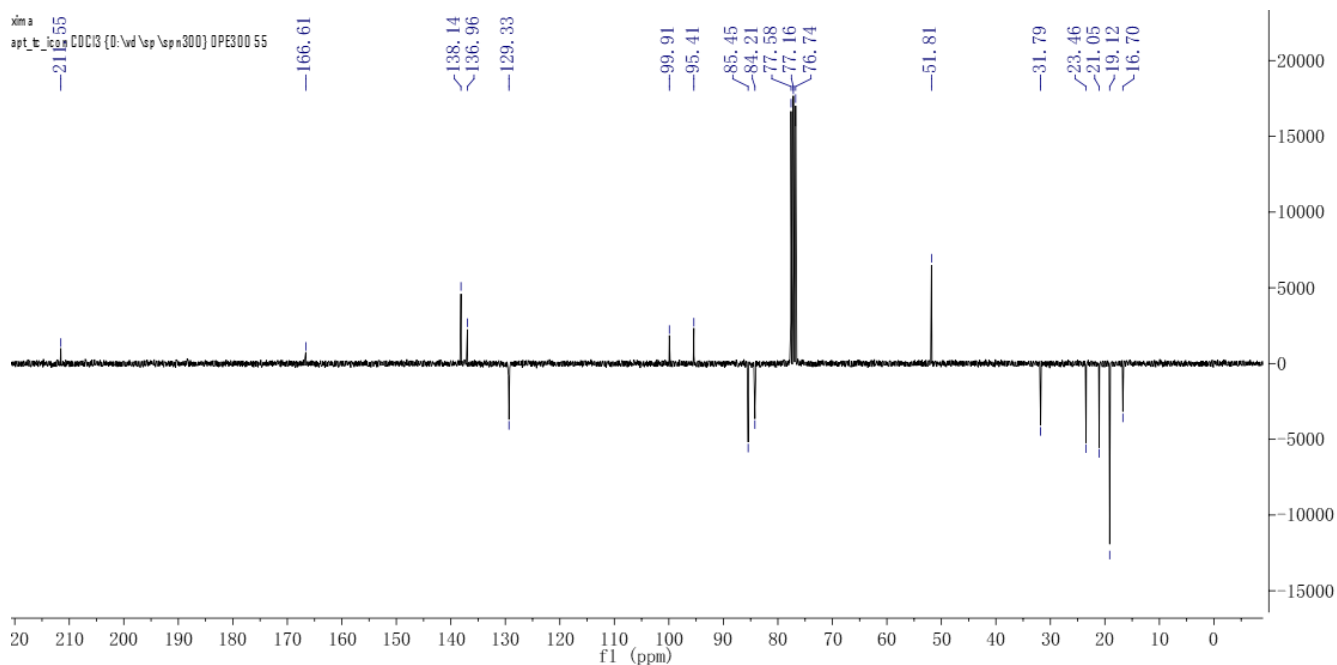

# SUPPORTING INFORMATION

## $^1\text{H}$ and $^{13}\text{C}\{^1\text{H}\}$ apt NMR of $[\text{RuCl}_2(\text{IPr})(p\text{-cymene})]$ (**4a**)

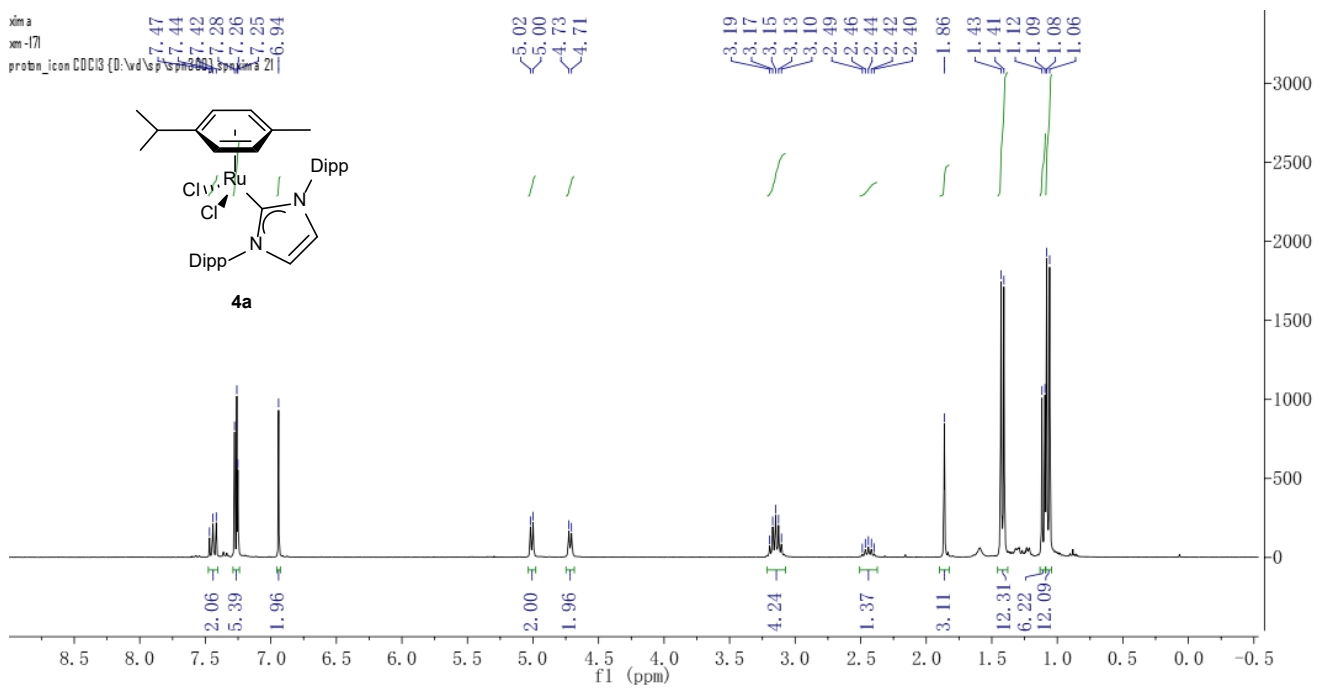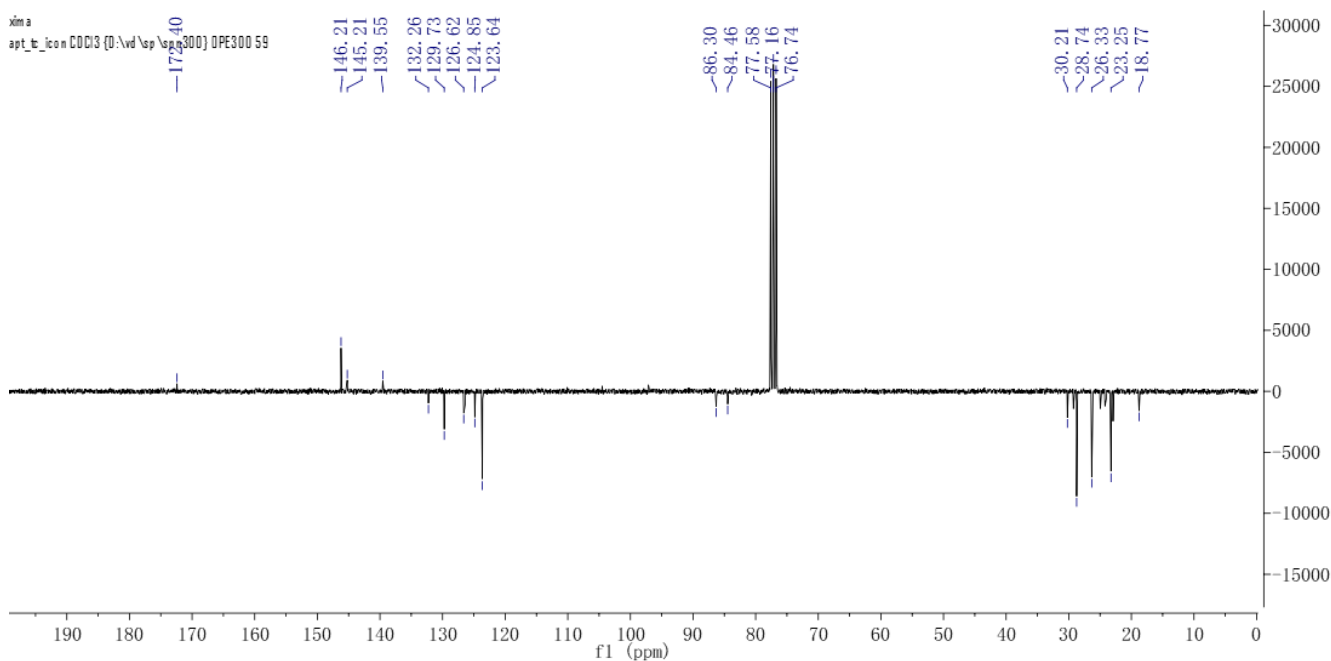

# SUPPORTING INFORMATION

## $^1\text{H}$ and $^{13}\text{C}\{^1\text{H}\}$ apt NMR of $[\text{RuCl}_2(\text{IMes})(p\text{-cymene})]$ (**4b**)

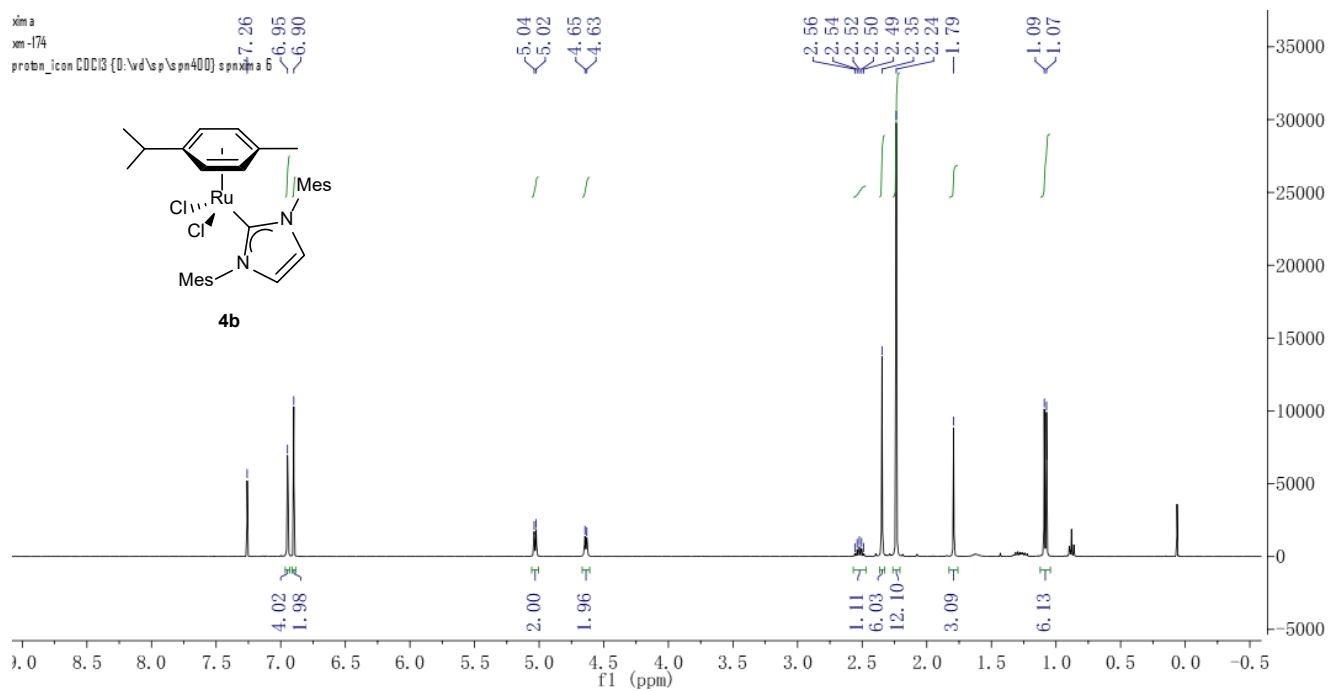

# SUPPORTING INFORMATION

## $^1\text{H}$ and $^{13}\text{C}\{^1\text{H}\}$ apt NMR of $[\text{RuCl}_2(\text{ICy})(p\text{-cymene})]$ (**4c**)

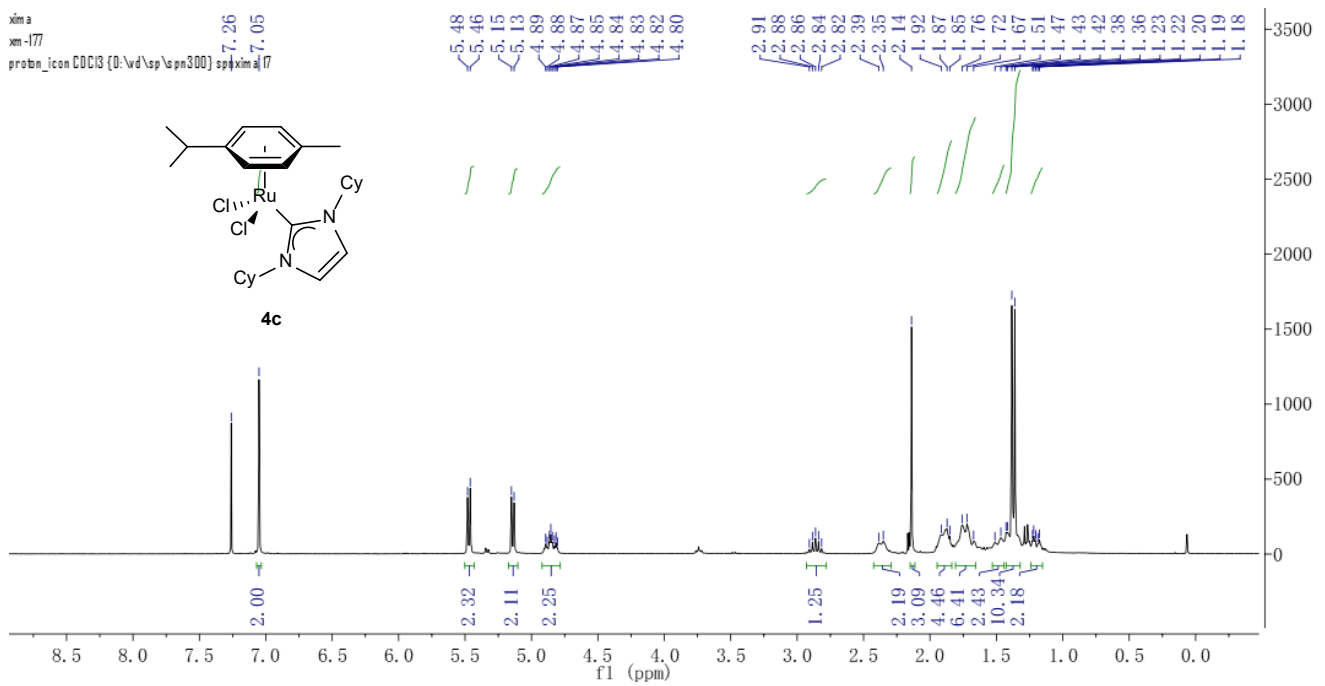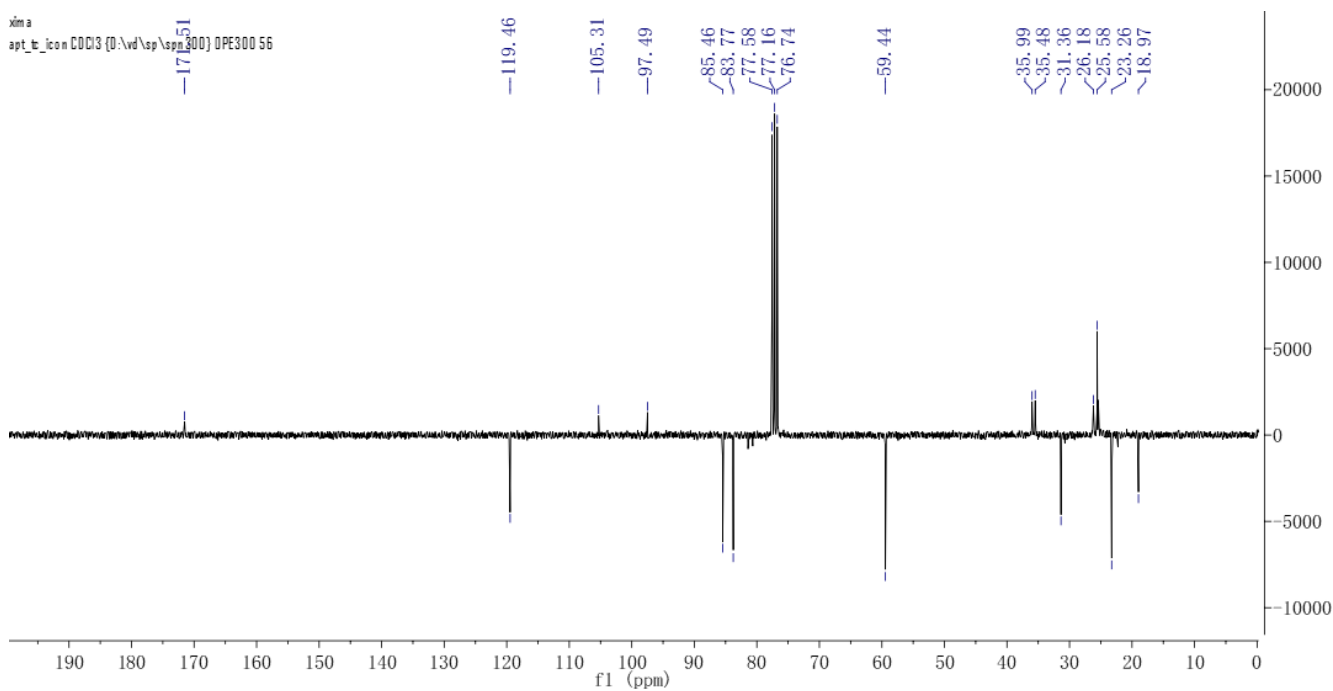

# SUPPORTING INFORMATION

## $^1\text{H}$ and $^{13}\text{C}\{^1\text{H}\}$ apt NMR of $[\text{RuCl}_2(\text{IMe})(p\text{-cymene})]$ (**4d**)

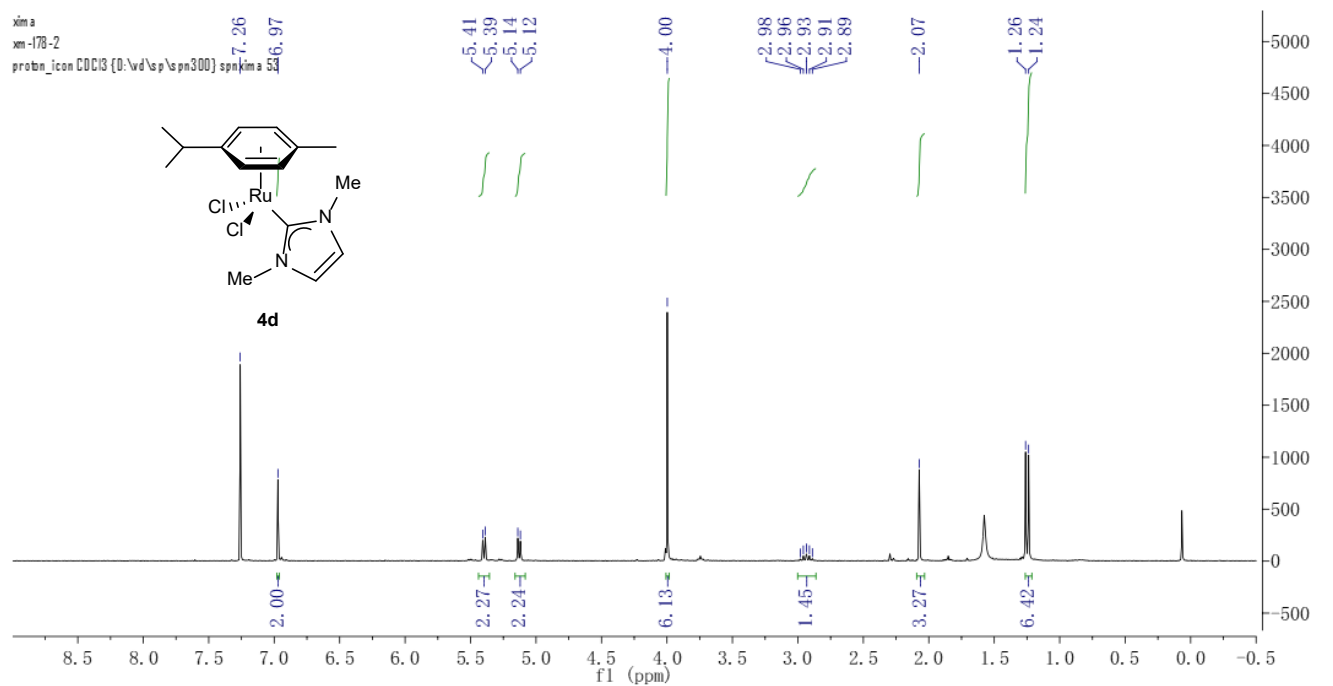



# SUPPORTING INFORMATION

## $^1\text{H}$ and $^{13}\text{C}\{^1\text{H}\}$ apt NMR of $[\text{RuCl}_2(\text{SIMes})(p\text{-cymene})]$ (**4e**)

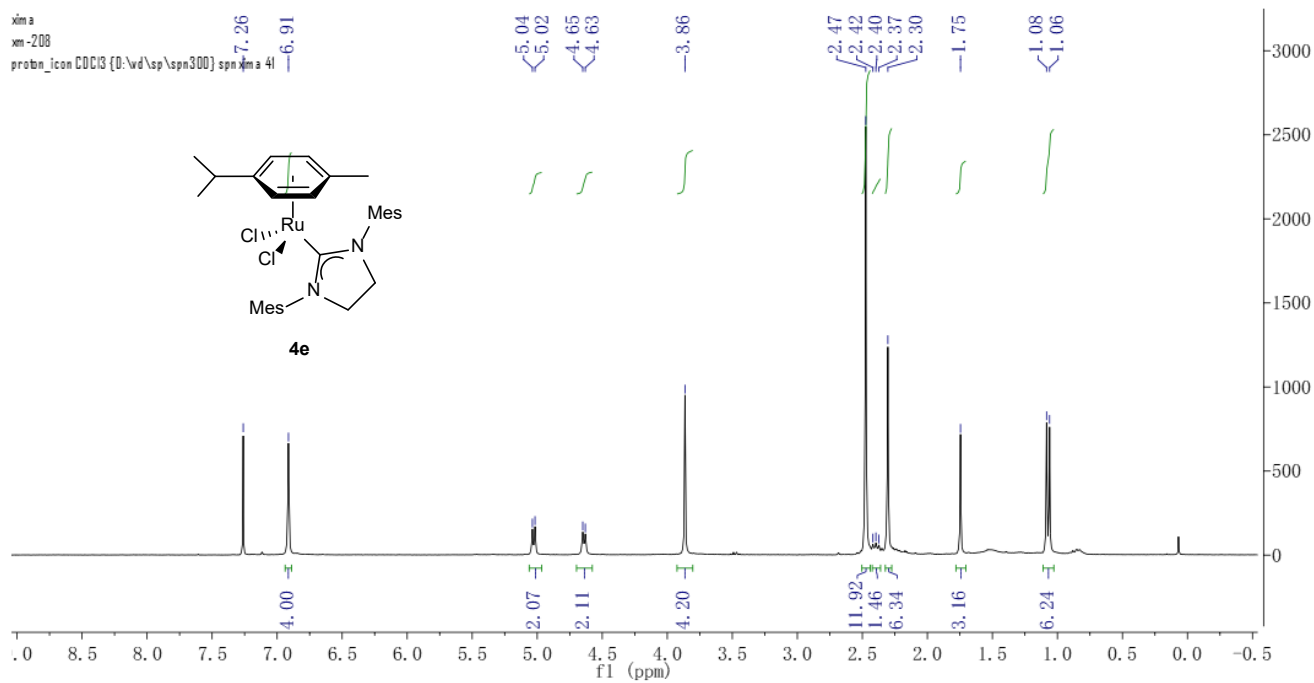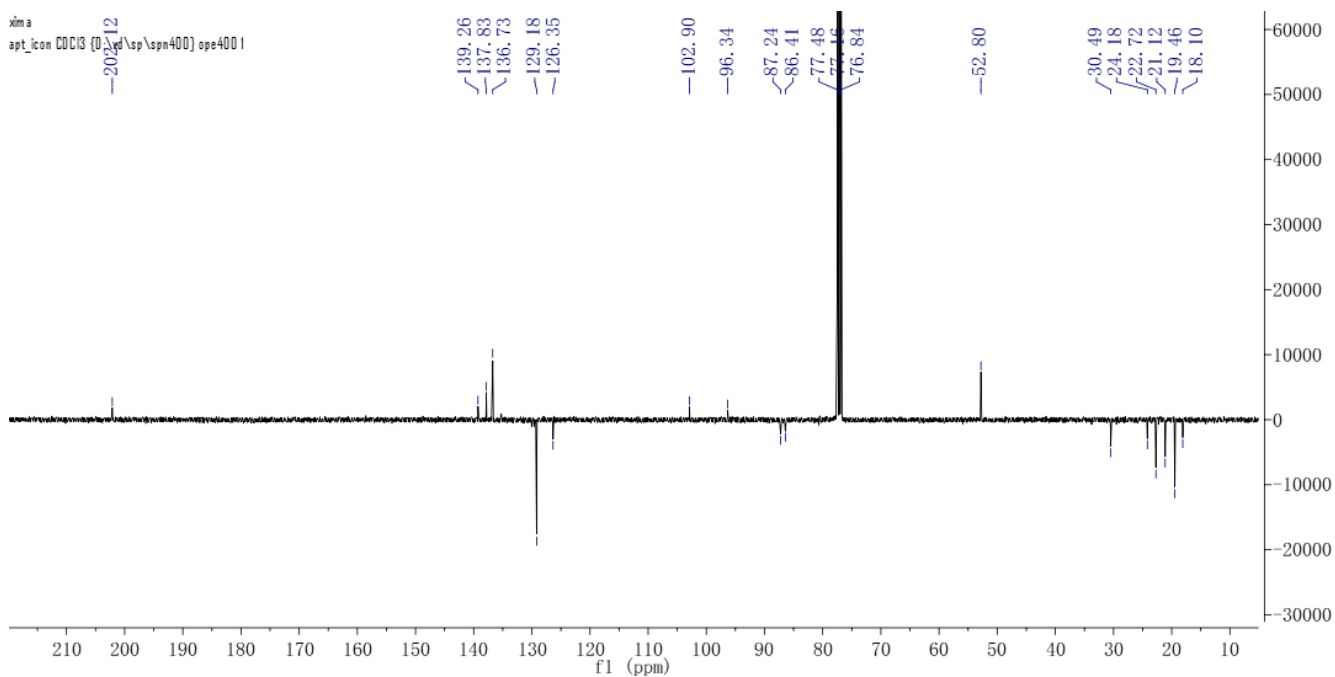

# SUPPORTING INFORMATION

## $^1\text{H}$ and $^{13}\text{C}\{^1\text{H}\}$ apt NMR of acetophenone (**6**)

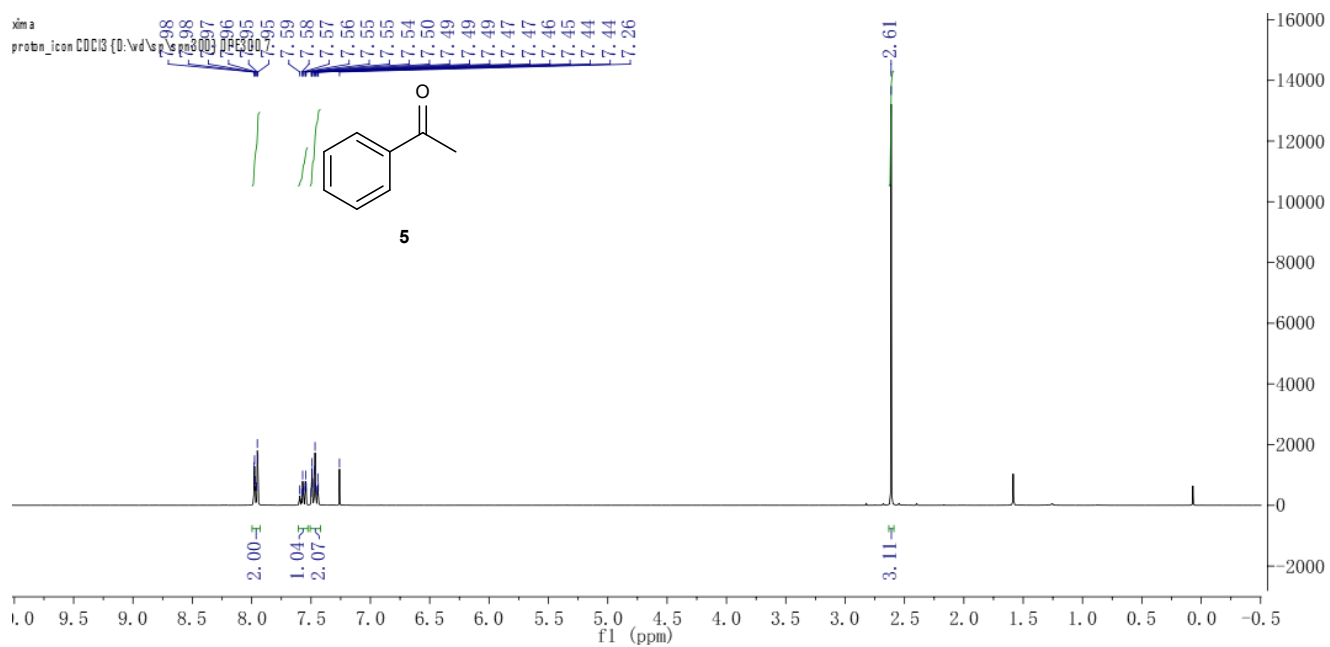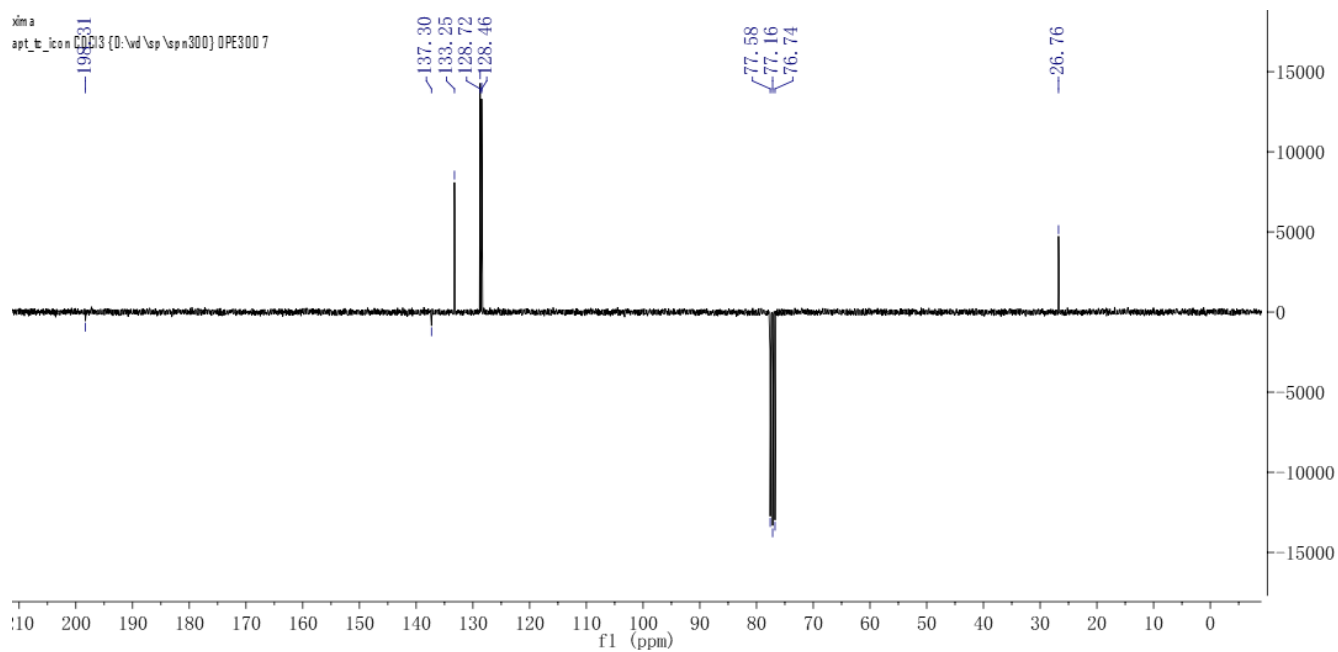

Supplement: d1dt00030f1.pdf [file d1dt00030f1.pdf]
